# Supplementary material for: Part II—Aroma Profile of Twenty White Grapevine Varieties: A Chemotaxonomic Marker Approach
Source: MDPI journal article supplement (doi:10.3390/agronomy13041168), 2023-04-20
Supplement: s1 [file s1]

**Supplementary Table S1.** Monthly climatic data in 2015, 2016 and 2017 vintages in 'Estación de Viticultura y Enología de Galicia' (EVEGA) grape vineyard germplasm bank.

| Month | T Max (°C) |      |      | T Mn (°C) |      |      | T Min (°C) |      |      | Rainfall (mm) |       |        |       |
|-------|------------|------|------|-----------|------|------|------------|------|------|---------------|-------|--------|-------|
|       | 2015       | 2016 | 2017 | 2015      | 2016 | 2017 | 2015       | 2016 | 2017 | 2015          | 2016  | 2017   |       |
| Jan   | 13.0       | 14.1 | 12.6 | 5.5       | 8.9  | 4.5  | 0.8        | 4.9  | 0.0  | 94.6          | 297.4 | 73.4   |       |
| Feb   | 13.8       | 14.5 | 16.8 | 6.6       | 8.4  | 9.4  | 1.3        | 3.9  | 4.2  | 50.8          | 204.4 | 213.1  |       |
| Mar   | 20.5       | 17.9 | 19.6 | 10.5      | 9.4  | 11.3 | 2.6        | 3.1  | 5.3  | 5.6           | 130.4 | 79.7   |       |
| Apr   | 23.8       | 19.6 | 27.1 | 14.1      | 11.6 | 14.3 | 6.4        | 5.3  | 4.1  | 74.6          | 155.0 | 15.4   |       |
| May   | 26.8       | 23.4 | 27.2 | 16.9      | 15.3 | 17.9 | 8.1        | 8.7  | 10.3 | 56.6          | 134.6 | 140.0  |       |
| Jun   | 32.6       | 29.1 | 30.1 | 21.0      | 19.5 | 21.0 | 11.3       | 11.2 | 13.3 | 9.8           | 31.8  | 22.2   |       |
| Jul   | 33.5       | 35.0 | 32.6 | 22.9      | 22.8 | 22.0 | 13.8       | 12.6 | 13.0 | 1.4           | 4.0   | 6.4    |       |
| Aug   | 31.1       | 35.5 | 33.9 | 21.2      | 22.2 | 21.7 | 12.8       | 11.7 | 12.2 | 10.2          | 4.4   | 41.2   |       |
| Sep   | 28.1       | 30.5 | 28.0 | 17.4      | 18.9 | 17.3 | 9.2        | 10.3 | 9.2  | 78.6          | 52.6  | 3.4    |       |
| Oct   | 22.3       | 24.5 | 28.6 | 14.3      | 14.7 | 15.1 | 8.7        | 8.4  | 6.4  | 136.6         | 52.8  | 22.4   |       |
| Nov   | 18.3       | 15.7 | 17.5 | 11.3      | 8.8  | 7.5  | 6.7        | 4.3  | 1.6  | 45.8          | 100.2 | 78.8   |       |
| Dec   | 16.1       | 14.0 | 12.7 | 9.4       | 6.5  | 6.2  | 4.8        | 2.5  | 2.1  | 94.6          | 44.2  | 173.0  |       |
| Mean  | 23.3       | 22.8 | 23.9 | 14.3      | 13.9 | 14.0 | 7.2        | 7.2  | 6.8  | Total         | 659.2 | 1211.8 | 869.0 |

**Supplementary Table S2.** Major volatile compounds in free and bound form.

| Compound | Family    | AG                                  | AA                           | BA                                          | BM                                  | BL                                                                 | DB                           | FP                           | GF                                          | GO                                                         | IT                               |
|----------|-----------|-------------------------------------|------------------------------|---------------------------------------------|-------------------------------------|--------------------------------------------------------------------|------------------------------|------------------------------|---------------------------------------------|------------------------------------------------------------|----------------------------------|
| F        | Acids     |                                     | Hexanoic acid                |                                             | 3-hydroxy-dodecanoic acid           | Hexanoic acid                                                      | Nonanoic acid                |                              | Hexanoic acid                               |                                                            | Octanoic Acid                    |
| F        | Alcohols  |                                     |                              |                                             |                                     | 2-ethyl-1-hexanol,                                                 |                              |                              |                                             |                                                            |                                  |
| F        | C6        | 2-Hexenal, (E)-                     | Hexanal                      | 2-Hexenal, (E)-                             |                                     | 1-Hexanol                                                          | Hexanal                      |                              | 1-Hexanol                                   |                                                            | 2-Hexenal, (E)-                  |
| F        | Aldehydes | Epidolichodial                      | Benzaldehyde                 | Epidolichodial                              |                                     | 3,4-dimethyl-3-cyclohexen-1-carboxaldehyde                         | 2,5-dimethyl-benzaldehyde,   | Benzaldehyde                 | 2,2-dimethyl-hexanal                        | 2,5-dimethyl-benzaldehyde                                  | Epidolichodial                   |
| F        | Esters    | Butanoic acid, 2-ethylhexyl ester   | Pentanoic acid, pentyl ester | 12,15-Octadecadiynoic acid, methyl ester    | Methyl formate                      | Pentanoic acid, 2,2,4-trimethyl-3-carboxyisopropyl, isobutyl ester | 2-Hydroxyhexadecyl butanoate |                              | Methyl formate                              |                                                            | 9-Tetradecen-1-ol, acetate, (E)- |
| F        | Phenols   | Phenol, 2,4-bis(1,1-dimethylethyl)- |                              | 4,6-di-tert-Butyl-m-cresol                  | Phenol, 2,4-bis(1,1-dimethylethyl)- | Estragole                                                          |                              | 4,6-di-tert-Butyl-m-cresol   |                                             | Phenol, 4,4'-butylidenebis[2-(1,1-dimethylethyl)-5-methyl- | 4,6-di-tert-Butyl-m-cresol       |
| F        | Ketones   |                                     |                              |                                             |                                     | Methyl Isobutyl Ketone                                             |                              |                              |                                             |                                                            |                                  |
| F        | PAHs      | Hemimellitene                       |                              | Mesitylene                                  | Hemimellitene                       | Mesitylene                                                         |                              |                              | Hemimellitene                               |                                                            |                                  |
| F        | Lactones  | dihydro-4,4,5,5-tetramethyl-        | Furaneol                     | dihydro-4,4,5,5-tetramethyl-2(3H)-furanone, |                                     | Furaneol                                                           |                              | hexahydro-3-methylene-2(3H)- | dihydro-4,4,5,5-tetramethyl-2(3H)-furanone, |                                                            | hexahydro-3-methylene-2(3H)-     |

|          |                |                                      |                             |                                     |                                      |                        |                                        |                                      |                             |                                     |                              |
|----------|----------------|--------------------------------------|-----------------------------|-------------------------------------|--------------------------------------|------------------------|----------------------------------------|--------------------------------------|-----------------------------|-------------------------------------|------------------------------|
|          |                | 2(3H)-furanone                       |                             |                                     |                                      |                        |                                        | benzofuranone                        |                             | benzofuranone                       |                              |
| F        | Norisoprenoids | $\beta$ damascenone                  |                             | $\delta$ -Damascone                 |                                      |                        |                                        | $\beta$ damascenone                  |                             |                                     |                              |
| F        | Sesquiterpenes | trans-Z- $\beta$ -Bisabolene epoxide |                             | $\gamma$ -Elemene                   | trans-Z- $\beta$ -Bisabolene epoxide |                        | Juniperol                              | trans-Z- $\beta$ -Bisabolene epoxide | Cedrene                     | 4 $\alpha$ H-Eudesmane              | 1.(Z)- $\alpha$ -Farnesene   |
| F        | Terpenes       | cis-Geraniol                         | Linalyl anthranilate        | <i>o</i> -Cymene                    | trans-Geranylacetone                 | Linalol                | $\alpha$ -Terpineol                    | Linalyl anthranilate                 | Eucalyptol                  | cis-Geraniol                        | Linalol                      |
| F        | Thiols         |                                      |                             |                                     | 2-methyl-2-undecanethiol,            |                        | 3-(methylthio)-nonanal,                | 2-methyl-2-undecanethiol,            |                             | 3-(methylthio)-nonanal,             |                              |
| Compound | Family         | AG                                   | AA                          | BA                                  | BM                                   | BL                     | DB                                     | FP                                   | GF                          | GO                                  | IT                           |
| A.P.     | Acids          |                                      |                             |                                     | Nonanoic acid                        |                        |                                        |                                      | Octanoic Acid               | Nonanoic acid                       |                              |
| A.P.     | Alcohols       | Benzyl Alcohol                       | 1-Octanol                   |                                     | Benzyl Alcohol                       |                        | Phenylethyl Alcohol                    |                                      | Benzyl Alcohol              |                                     |                              |
| A.P.     | C6             |                                      |                             |                                     |                                      | 1-Hexanol              |                                        |                                      |                             |                                     |                              |
| A.P.     | Aldehydes      | 2-Octenal, (E)-                      | Octanal                     | Benzaldehyde                        |                                      | 3,7-dimethyl-6-Nonenal | Octanal                                | Decanal                              | Benzaldehyde                |                                     | Decanal                      |
| A.P.     | Esters         | Nonanoic acid, methyl ester          |                             | Salicylic acid, methyl ester        | Nonanoic acid, methyl ester          |                        | Benzoic acid, 2-hydroxy-, methyl ester |                                      | Nonanoic acid, methyl ester | Nonanoic acid, ethyl ester          | Salicylic acid, methyl ester |
| A.P.     | Phenols        | Phenol, 2,4-bis(1,1-dimethylethyl)-  | Phenol, 2-methoxy-4-propyl- | Phenol, 2,4-bis(1,1-dimethylethyl)- | Phenol, 2-methoxy-4-propyl-          |                        | Phenol, 2,4-bis(1,1-dimethylethyl)-    |                                      | Phenol, 2-methoxy-4-propyl- | Phenol, 2,4-bis(1,1-dimethylethyl)- | Phenol, 2-methoxy-4-propyl-  |
| A.P.     | Ketones        | Benzophenone                         | Methyl Isobutyl             | Benzophenone                        | Methyl Isobutyl                      | Benzophenone           |                                        | Methyl Isobutyl Ketone               |                             |                                     | Benzophenone                 |

|          |                |                                              |                                  |                          |                                 |                                                            |                            |                              |                                                                    |                            |                                          |
|----------|----------------|----------------------------------------------|----------------------------------|--------------------------|---------------------------------|------------------------------------------------------------|----------------------------|------------------------------|--------------------------------------------------------------------|----------------------------|------------------------------------------|
|          |                | Ketone                                       |                                  |                          | Ketone                          |                                                            |                            |                              |                                                                    |                            |                                          |
| A.P.     | PAHs           | psi. -Cumene                                 | Hemimellitene                    | Mesitylene               | Hemimellitene                   | psi. -Cumene                                               |                            |                              | Hemimellitene                                                      |                            |                                          |
| A.P.     | Lactones       | tetrahydro-6-nonyl-2H-pyran-2-one,           |                                  |                          |                                 |                                                            |                            |                              |                                                                    |                            |                                          |
| A.P.     | Norisoprenoids |                                              | Dihydro-β-ionol                  |                          |                                 | Megastigma-3,7(E),9-triene                                 |                            | Ionone                       |                                                                    | Dihydro-β-ionol            |                                          |
| A.P.     | Sesquiterpenes | Patchoulane                                  |                                  | Caryophyllene oxide      | Patchoulane                     | trans-Z-β-Bisabolene epoxide                               | Longipinene epoxide        | trans-Z-β-Bisabolene epoxide |                                                                    | Patchoulane                |                                          |
| A.P.     | Terpenes       | Dihydrocitronellol                           | Tetrahydrolinalool               | Dihydrocitronellol       | cis-Geraniol                    |                                                            | Linalol                    |                              | Carvacrol                                                          |                            | Linalol                                  |
| A.P.     | Thiols         | 2-methyl-2-undecanethiol                     |                                  | 2-methyl-2-undecanethiol |                                 | 2-ethyl 1-hexanethiol                                      |                            | 2-methyl-2-undecanethiol,    |                                                                    |                            |                                          |
| Compound | Family         | JA                                           | LA                               | MBM                      | PA                              | PI                                                         | PF                         | RA                           | SI                                                                 | TO                         | TR                                       |
| F        | Acids          | 3-hydroxy-dodecanoic acid                    | Hexanoic acid                    | Acetic acid              | Nonanoic acid                   |                                                            | Hexanoic acid              |                              | Nonanoic acid                                                      |                            | 3-hydroxy-dodecanoic acid                |
| F        | Alcohols       |                                              |                                  |                          |                                 | 1-Hexanol, 2-ethyl-                                        |                            |                              |                                                                    |                            |                                          |
| F        | C6             | 2-Hexenal, (E)-                              |                                  | 1-Hexanol                | 2-Hexenal, (E)-                 | 1-Hexanol                                                  |                            | 2-Hexenal, (E)-              |                                                                    | 1-Hexanol                  | 2-Hexenal, (E)-                          |
| F        | Aldehydes      | Epidolichodial                               | 2,5-dimethyl-benzaldehyde,       |                          |                                 | Benzaldehyde                                               | 2,5-dimethyl-benzaldehyde, |                              | Benzaldehyde                                                       |                            |                                          |
| F        | Esters         | 9-Octadecenoic acid (Z)-, phenylmethyl ester | 9-Tetradecen-1-ol, acetate, (E)- | Methyl formate           | Tetradecanoic acid, ethyl ester | 6,9,12-Octadecatrienoic acid, phenylmethyl ester, (Z,Z,Z)- |                            | Methyl formate               | Pentanoic acid, 2,2,4-trimethyl-3-carboxyisopropyl, isobutyl ester | Hexanoic acid, ethyl ester | 13,16-Octadecadiynoic acid, methyl ester |

|          |                |                                            |                                                               |                            |                                            |                            |                                       |                          |                                                             |                                            |                                |
|----------|----------------|--------------------------------------------|---------------------------------------------------------------|----------------------------|--------------------------------------------|----------------------------|---------------------------------------|--------------------------|-------------------------------------------------------------|--------------------------------------------|--------------------------------|
| F        | Phenols        | 4,6-di-tert-Butyl-m-cresol                 | Estragole                                                     | 4,6-di-tert-Butyl-m-cresol | Estragole                                  | 4,6-di-tert-Butyl-m-cresol | Phenol, 3,5-bis (1,1-dimethylethyl) - | Estragole                | Phenol, 4,4'-butylidenebis [2-(1,1-dimethylethyl)-5-methyl- | Estragole                                  |                                |
| F        | Ketones        | Methyl Isobutyl Ketone                     |                                                               |                            |                                            |                            |                                       |                          |                                                             |                                            |                                |
| F        | PAHs           | Hemimellitene                              |                                                               |                            |                                            |                            | Mesitylene                            | Hemimellitene            | psi. -Cumene                                                | Hemimellitene                              |                                |
| F        | Lactones       | dihydro-4,4,5,5-tetramethyl-2(3H)-furanone | 2-(1-hydroxy-1-methyl-2-oxopropyl)-2,5-dimethyl-3(2H)-furanon | Furaneol                   | dihydro-4,4,5,5-tetramethyl-2(3H)-furanone |                            |                                       |                          | Furaneol                                                    | dihydro-4,4,5,5-tetramethyl-2(3H)-furanone | Furaneol                       |
| F        | Norisoprenoids | $\beta$ damascenone                        |                                                               |                            |                                            |                            | $\beta$ damascenone                   |                          |                                                             |                                            |                                |
| F        | Sesquiterpenes | Farnesan                                   |                                                               |                            |                                            |                            | $\alpha$ -Bisabolol                   |                          | 4 $\alpha$ H-Eudesmane                                      | Caryophyllene oxide                        |                                |
| F        | Terpenes       | Borneol                                    | cis-Geraniol                                                  | Linalol                    | Linalol                                    | m-Cymene                   | $\beta$ -Cyclocitral                  | $\beta$ -Cyclocitral     | cis-Geraniol                                                | $\beta$ -Terpinyl acetate                  | Cis-2,6-Dimethyl-2,6-octadiene |
| F        | Thiols         | 2-methyl-2-undecanethiol                   |                                                               |                            |                                            | 2-methyl-2-undecanethiol   | 3-(methylthio)-nonanal,               | 2-methyl-2-undecanethiol | 2-ethyl-1-hexanethiol                                       | 2-methyl-2-undecanethiol                   |                                |
| Compound | Family         | JA                                         | LA                                                            | MBM                        | PA                                         | PI                         | PF                                    | RA                       | SI                                                          | TO                                         | TR                             |
| A.P.     | Acids          | Nonanoic acid                              |                                                               | 3-methyl-decanoic acid     | Nonanoic acid                              |                            |                                       |                          |                                                             | 3-methyl-decanoic acid                     | Nonanoic acid                  |
| A.P.     | Alcohols       | Phenylethyl Alcohol                        | Benzyl Alcohol                                                | Phenylethyl Alcohol        |                                            | Benzyl Alcohol             |                                       | Phenylethyl Alcohol      | Benzyl Alcohol                                              |                                            |                                |
| A.P.     | C6             | 1-Hexanol                                  |                                                               |                            |                                            |                            |                                       |                          |                                                             |                                            |                                |
| A.P.     | Aldehydes      | Benzaldehyde                               | Decanal                                                       |                            |                                            | Benzaldehyde               |                                       | Octanal                  | Benzaldehyde                                                |                                            | Decanal                        |

|      |                |                                     |                                               |                             |                |                              |                                     |                             |                              |
|------|----------------|-------------------------------------|-----------------------------------------------|-----------------------------|----------------|------------------------------|-------------------------------------|-----------------------------|------------------------------|
| A.P. | Esters         | Nonanoic acid, methyl ester         | Salicylic acid, methyl ester                  | Nonanoic acid, methyl ester |                | Salicylic acid, methyl ester |                                     | Octanoic acid, methyl ester | Salicylic acid, methyl ester |
| A.P. | Phenols        | Phenol, 2,4-bis(1,1-dimethylethyl)- |                                               | Phenol, 2-methoxy-4-propyl- |                |                              | Phenol, 2,4-bis(1,1-dimethylethyl)- |                             |                              |
| A.P. | Ketones        | Methyl Isobutyl Ketone              |                                               | Benzophenone                |                |                              | Methyl Isobutyl Ketone              | Benzophenone                | Acetophenone Benzophenone    |
| A.P. | PAHs           | Hemimellitene                       | Mesitylene                                    | Hemimellitene               |                | psi-Cumene                   | Hemimellitene                       | psi-Cumene                  | Hemimellitene                |
| A.P. | Lactones       | δ Dodecalactone                     |                                               |                             |                |                              |                                     |                             |                              |
| A.P. | Norisoprenoids |                                     |                                               | β-Damascenone               |                | Dihydro-β-ionol              | β-Damascenone                       | Dihydro-β-ionol             |                              |
| A.P. | Sesquiterpenes | Patchoulane                         | trans-Z-β-Bisabolene epoxide                  | Longipinene epoxide         | (E,E)-Farnesol |                              | Caryophyllene oxide                 | Longiborneol                | trans-Z-β-Bisabolene epoxide |
| A.P. | Terpenes       | Thymol                              | Dihydrocitronellol                            | cis-Geraniol                | Linalol        | Dihydrocitronellol           | Thymol                              | Dihydrocitronellol          | AR 1 Dihydrocitronellol      |
| A.P. | Thiols         | 2-methyl-2-undecanethiol            | 4-(phenylthio)-3,7-dimethylocta-2,6-dien-1-ol |                             |                |                              | 2-methyl-2-undecanethiol            |                             |                              |

F: free volatile; A.P.: aromatic precursors; PAH's: polycyclic aromatic hydrocarbons. See [Table 1](#) for varieties abbreviations.
